1 **Recognition of non-self is necessary to activate *Drosophila's***  
2 **immune response against an insect parasite**

3

4

5

6

7 Alexandre B. Leitão<sup>\*1,2</sup>, Ramesh Arunkumar<sup>\*1</sup>, Jonathan P. Day<sup>1</sup>, Nancy Hanna<sup>1</sup>,  
8 Aarathi Devi<sup>1,3</sup>, Matthew P. Hayes<sup>4</sup>, Francis Jiggins<sup>1</sup>

9

10

11 \* Contributed equally

12  Corresponding authors: [alexandre.leitao@research.fchampalimaud.org](mailto:alexandre.leitao@research.fchampalimaud.org), [fmj1001@cam.ac.uk](mailto:fmj1001@cam.ac.uk);

13

14 <sup>1</sup>Department of Genetics, University of Cambridge, Cambridge, United Kingdom

15 <sup>2</sup>Champalimaud Foundation, Portugal

16 <sup>3</sup>Royal College of Surgeons in Ireland, Ireland

17 <sup>4</sup>Department of Zoology, University of Cambridge, Cambridge, United Kingdom

18

19

20

## 21 **Abstract**

22

23 Innate immune responses can be activated by pathogen-associated molecular  
24 patterns (PAMPs) or danger signals released by damaged tissues. As PAMPs are  
25 typically conserved across broad groups of pathogens but absent from the host,  
26 it is unclear whether they allow hosts to recognize parasites that are  
27 phylogenetically related to themselves, such as parasitoid wasps infecting  
28 insects. Parasitoids must penetrate the cuticle of *Drosophila* larvae to inject their  
29 eggs. In line with previous results, we find that the danger signal of wounding  
30 triggers the differentiation of specialized immune cells called lamellocytes.  
31 However, using oil droplets to mimic infection by a parasitoid wasp egg, we find  
32 that the activation of melanization response that kills parasitoids also requires  
33 exposure to a parasitoid wasp molecule that acts as a PAMP. The unidentified  
34 factor enhances the transcriptional response in hemocytes and induces a specific  
35 response in the fat body that includes *Tep1*, which is essential for efficient  
36 melanization. We conclude that a combination of danger signals and PAMPs are  
37 required activate *Drosophila's* immune response against parasitic insects.  
38

39

## 40 **Introduction**

41

42 Organisms must be able to reliably detect when they are infected in order to  
43 mount an appropriate immune response, and this frequently relies on the  
44 recognition of non-self. In the case of innate immune systems, pattern  
45 recognition receptors (PRRs) detect pathogen-associated molecular patterns  
46 (PAMPs). These are typically molecules such as flagellin or peptidoglycan that  
47 are absent from the host but highly conserved across a broad class of pathogens  
48 [1]. An alternative way to sense infection is to detect danger signals such as cell  
49 damage. Here, damaged cells release damage-associated molecular patterns  
50 (DAMPs), which bind host receptors and trigger the immune response [2].  
51 Finally, pathogens may be detected because of ‘missing self’—they lack some  
52 factor found on host cells that inhibits immune activation [3].

53

54 Sometimes, immune responses must be mounted against parasites that are  
55 closely related to the host. For example, plants can be infected by other plants,  
56 insects by other insects, and some mammals are even infected by transmissible  
57 cancer cells derived from their own species [4]. In one of the few cases that have  
58 been characterized, tomato plants have evolved a PRR to recognize a PAMP  
59 produced by the pathogenic plant *Cuscuta reflexa* [5,6]. However, it is unclear  
60 whether this will be more broadly true. In many cases, it may be difficult to  
61 recognize PAMPs as there will be fewer conserved differences between closely  
62 related pairs of hosts and pathogens. This problem may be exacerbated as there  
63 is selection on the pathogen to escape recognition by losing their PAMPs, and  
64 this may be easier to evolve if you are already similar to your host. If this is the  
65 case, recognition may rely on danger signals or detecting missing-self.

66

67 This problem is especially acute for insects, as their most important parasites are  
68 frequently other insects [7]. Many parasitoid wasps infect their insect hosts by  
69 injecting eggs into their haemocoel. Typically, infection by parasitoids leads to  
70 activation of an immune response that involves the formation of a cellular  
71 capsule around the parasitoid egg that later becomes melanized [8–10]. The  
72 cellular immune response to parasitoid wasps in *Drosophila melanogaster*  
73 involves the differentiation of a hemocyte type rarely found in healthy larvae, the  
74 lamellocyte [8]. These form the outer-layer of the cellular capsule around the  
75 parasitoid egg, which is melanized when pro-phenoloxidase 2 and 3 (PPO2 and  
76 PPO3) are activated in crystal cells and lamellocytes respectively [11].

77

78 The recognition of parasitoid infections relies in part on danger signals.  
79 Lamellocyte differentiation can be triggered by sterile wounding of the larval  
80 cuticle [12], which presumably mimics a parasitoid piercing the cuticle with its  
81 ovipositor. Furthermore, in many insects, introducing inert objects into the  
82 haemocoel leads to a cellular encapsulation response [13], and in species like *D.*  
83 *yakuba*, this is accompanied by the object being melanized [14,15]. However, in  
84 other cases these danger signals only lead to an incomplete immune response, as  
85 a cellular capsule forms but is not melanized [16], or, in species like *D.*  
86 *melanogaster*, there is only a low level of melanization [15,17]. Interestingly, *D.*  
87 *melanogaster* larvae that have been parasitized by the wasp *Asobara tabida* are

88 more likely to strongly melanize inert objects [17]. This suggests that a PAMP  
89 injected by the parasitoid might activate the melanization response. Here, we  
90 examine how the combination of danger signals and PAMPs activate different  
91 components of the immune response of *D. melanogaster* to parasitoid wasps.

92

## 93 **Results**

94

### 95 **Danger signals induce immune cell differentiation**

96

97 Parasitoid wasp attack induces the rapid differentiation of blood cells called  
98 lamellocytes, which encapsulate and melanize the wasp. It has previously been  
99 reported that sterile wounding of larval cuticle induces lamellocyte  
100 differentiation [12]. In line with this, we found that injecting a droplet of paraffin  
101 oil induced lamellocyte differentiation (Figure 1A; main effect of treatment:  $F =$   
102  $36.187$ , d.f. = 2, 38,  $p = 1.59 \times 10^{-9}$ ; oil vs. control  $t = 5.298$ , d.f. = 38,  $p < 1.57 \times 10^{-5}$ ).

103

104 To examine the role of PAMPs in this response, we homogenized adult male  
105 wasps in the paraffin oil before injecting the fly larvae. Therefore, this treatment  
106 combines both the wounding from injection and exposure to PAMPs. We found  
107 that the addition of wasp homogenate led to a larger number of lamellocytes  
108 being produced (Figure 1A; oil vs. wasp homogenate  $t = 3.26$ , d.f. = 38,  $p = 0.007$ ).  
109 This suggests that danger signals resulting from the wound created by the female  
110 ovipositor are the primary factor triggering lamellocyte differentiation, but the  
111 response is amplified by recognition of non-self from wasps.

112

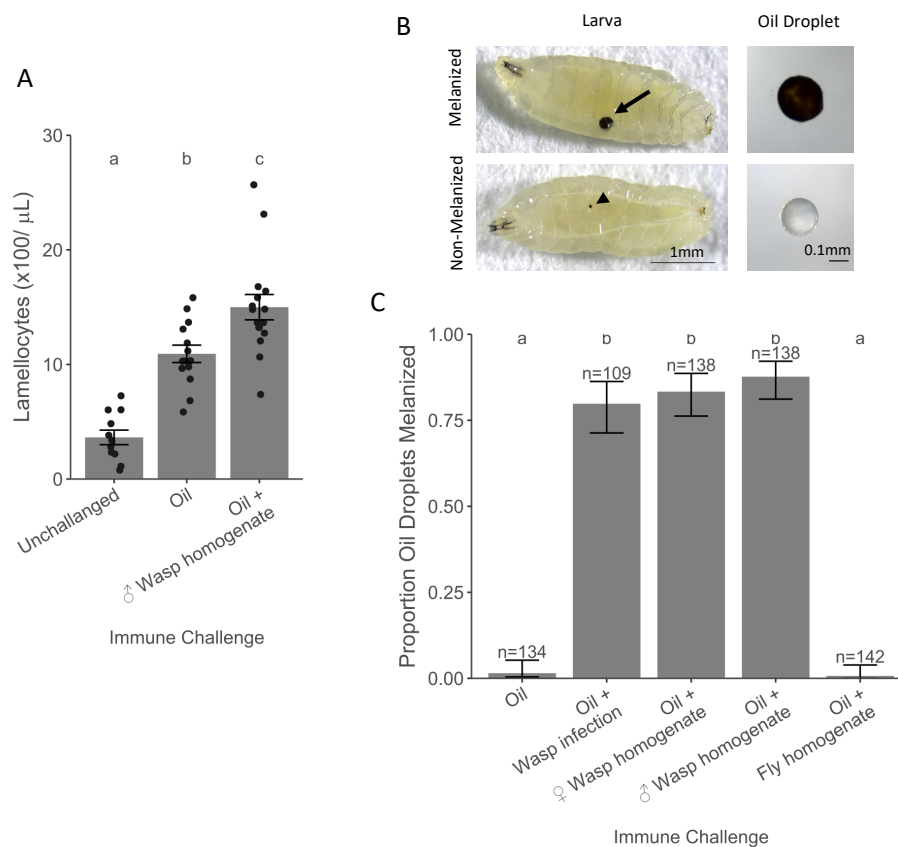

113  
114  
115  
116  
117  
118  
119  
120  
121  
122  
123

**Figure 1. The effect of parasitoid wasp exposure on the melanization of oil droplets** (A) Concentration of lamellocytes in the hemolymph of unchallenged larvae and larvae 48h post injection with oil or oil + wasp homogenate. The data points are independent measurements on hemolymph pooled from 8-10 larvae. (B) Oil droplets injected into larvae are either melanized (arrow) or not. Melanization of cuticle resulting from injection wounding is often visible (arrow head). (C) Proportion of larvae with melanized oil droplets 48h after different immune challenges. Different letters represent treatments with statistically significant differences (Tukey's Honest Significant Difference Test,  $p < 0.01$ ).

## 124 Parasite molecules activate the melanization response

125

126 The final step of the immune response against parasitoid wasps is the  
127 melanization of the wasp egg. To test if this requires the recognition of non-self,  
128 we examined whether paraffin oil droplets were melanized 48h after injection  
129 (Figure 1B). Wounding alone was not sufficient to activate this response, as  
130 paraffin oil by itself did not induce a strong melanization reaction (Figure 1C).  
131 However, if larvae were previously infected by a low virulence *L. boulandi* strain  
132 (G486), the melanization of the oil droplet increases (Figure 1C; main effect of  
133 treatment:  $X^2 = 577.39$ , d.f = 4,  $p < 2 \times 10^{-16}$ ; oil vs. oil + wasp infection:  $z = 7.612$ ,  
134  $p = 2 \times 10^{-13}$ ). Therefore, the presence of the parasite is required to trigger this  
135 immune response.

136

137 To test whether parasitoid wasp PAMPs are responsible for the activation of the  
138 immune response, we injected flies with paraffin oil containing homogenized  
139 female wasps. This led to a robust melanization response that was

140 indistinguishable from that seen when the flies had been parasitized (Figure 1C;  
141 female wasp homogenate vs oil:  $z=7.967$ ,  $p = 1 \times 55^{-14}$ ). Furthermore, this  
142 reaction is not due to the presence of eggs or venoms in the female wasp  
143 homogenates, as male wasp homogenates induced a similar response (Figure 1C;  
144 male homogenate vs female homogenate:  $z=1.051$ ,  $p=1$ ).

145

146 The immune response to our crude homogenate of parasitoid wasp could be a  
147 specific response to PAMPs in the parasitoid tissue or a general response to  
148 injecting damaged cells, which are known to release DAMPs that activate the  
149 innate immune system [18]. To distinguish these hypotheses, we injected larvae  
150 with paraffin oil containing *D. melanogaster* homogenate. This did not induce  
151 melanization (Figure 1C; oil vs fly homogenate:  $z=-0.634$ ,  $p=1$ ). Together, these  
152 results indicate that the *D. melanogaster* immune system recognizes non-self  
153 molecules in the parasitoid wasp to activate the melanization response.

154

155 To determine if the fly immune system recognizes wasp proteins, we treated the  
156 wasp homogenate with proteinase K, a broad range serine protease [19]. This  
157 did not reduce the proportion of melanized oil droplets (Figure S1, main effect of  
158 treatment:  $X^2 = 102.24$ ,  $d.f = 4$ ,  $p < 2 \times 10^{-16}$ ; No autoclave vs. No autoclave +  
159 Proteinase K:  $z = 1.267$ ,  $p = 1$ ). Serendipitously, we tested samples where wasps  
160 were autoclaved before homogenization. In itself this has no effect on  
161 melanization rates (Autoclave vs. No autoclave:  $z = 1.254$ ,  $p = 1$ ). However, when  
162 the autoclaved homogenate is treated with proteinase K, the number of  
163 melanized oil droplets is significantly reduced (Autoclave vs. Autoclave +  
164 Proteinase K:  $z = 5.41$ ,  $p = 6.3 \times 10^{-7}$ ). This result suggests that one or more  
165 proteins in the wasp body act as PAMPs to activate the fly immune system.

166

167

## 168 **PAMPs activate the humoral immune response**

169

170

171 In addition to the cellular immune response, the melanization of the capsule  
172 formed around wasp eggs relies on a humoral immune response involving the  
173 secretion of molecules from the fat body [20]. To understand the effects of  
174 danger signals and wasp PAMPs on this response, we sequenced RNA extracted  
175 from fat body 24h post injection of paraffin oil, paraffin oil with wasp  
176 homogenate and from non-injured controls (unchallenged). After aligning the  
177 RNA-seq reads to the *D. melanogaster* genome, the number of uniquely mapped  
178 exonic reads ranged from 3,288,236 to 15,962,793 (Table 1B).

179

180 The injection of paraffin oil alone did not lead to the significant upregulation of  
181 any genes at 24h, but the addition of wasp homogenate upregulated 29 genes  
182 (Figure 2A-B). Ten of these encode serine proteases with a trypsin domain  
183 (Table S2), a class of proteins known to be involved in the melanization cascade  
184 and Toll pathway [20]. Other upregulated genes encode immunity-related  
185 molecules, including Toll, thioester-containing proteins (TEPs) and a fibrinogen.

186

187 To confirm the specific response to wasp homogenate, we chose a subset of the  
188 genes and analysed gene expression with qPCR. This revealed that wounding and

189 the wasp PAMP elicit distinct humoral immune responses. The injection of  
190 paraffin oil alone was sufficient to upregulate Bomanin genes, which encode  
191 short peptides that play a role in killing bacterial pathogens [21] (Figure 2C;  
192 Unchallenged vs Oil:  $p=0.04$ ,  $p=0.05$  and  $p=0.10$ ). However, other genes  
193 including secreted serine proteases, a lectin and a Tep were specifically  
194 upregulated in the presence of the wasp homogenate (Figure 2C). This suggests  
195 that a humoral immune response against bacteria can be triggered by wounding,  
196 but PAMPs are required for the specific anti-parasitoid response.

197

198 Genes upregulated upon wasp homogenate injection include *Tep1* and *Tep2*  
199 (Figure 2B-C), which encode secreted complement-like proteins. TEPs are  
200 involved in resistance against bacteria, fungi and parasitoid wasps [22,23], and  
201 in the mosquito *Anopheles gambiae* they act as an opsin, binding to the  
202 ookinetes of *Plasmodium* eggs [24]. We therefore tested the role of *Tep1* in the  
203 melanization process. Knocking down *Tep1* expression with RNAi reduced the  
204 ability of larvae to melanize the oil droplet prepared with wasp homogenate  
205 (Figure 2D, main effect of treatment:  $X^2 = 16.367$ , d.f = 1,  $p = 4.525 \times 10^{-5}$ ).  
206 Therefore, the wasp PAMPs upregulate genes required for the immune response  
207 that kills the parasite.

208

209

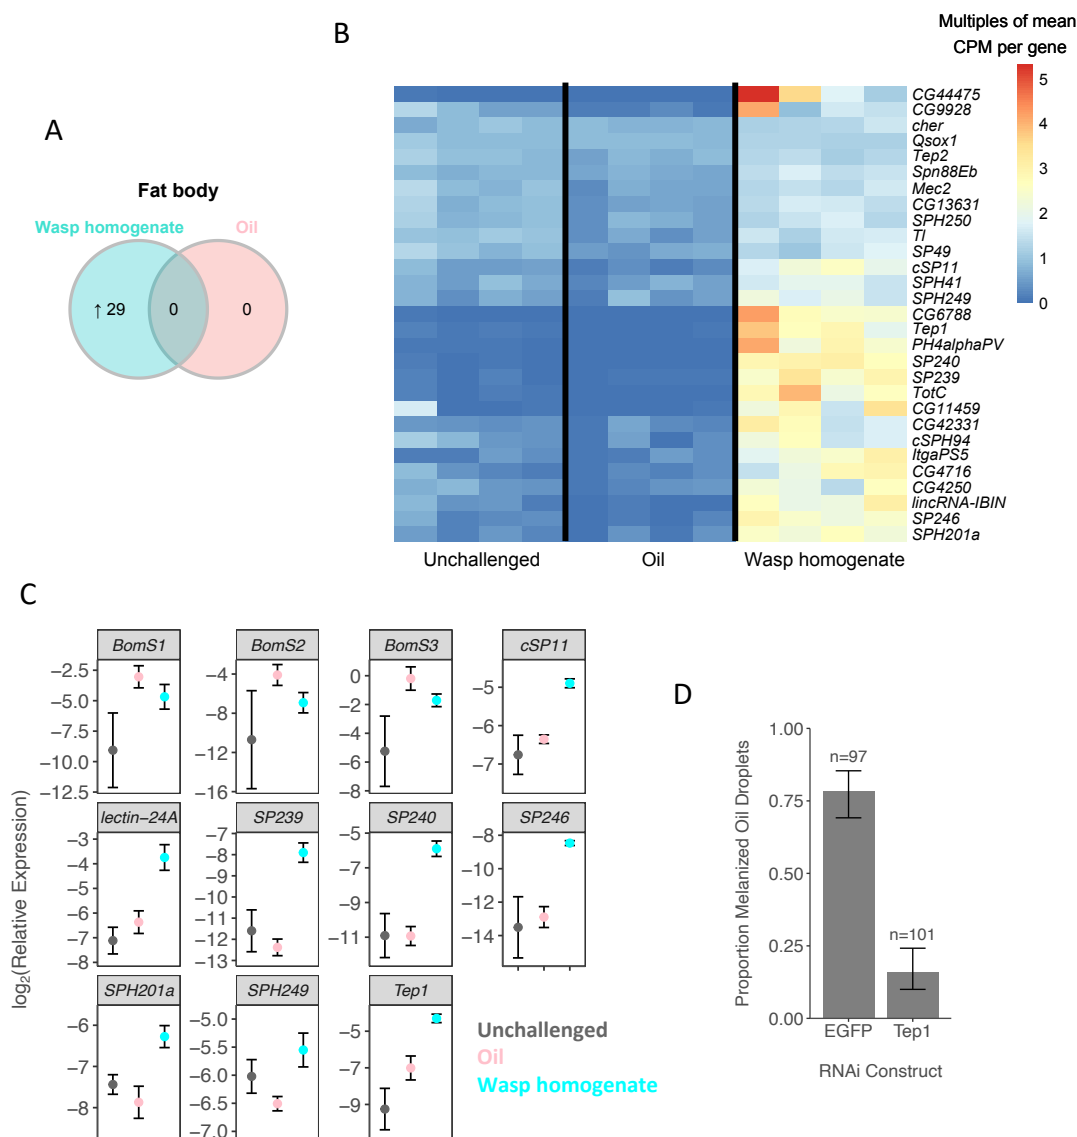

**Figure 2 – Transcriptional response of fat body to wasp exposure** Larvae were injected with oil, wasp + oil or unchallenged. RNA from the fat body was sequenced 24h post treatment. (A) The number of genes with significantly changes in expression compared with unchallenged conditions. (B) The expression of 29 genes with significantly changes in expression after immune challenge. (C) The rate of melanization of wasp + oil droplets in transgenic flies that express constructs to knock down the expression of *Tep1* or eGFP (control).

## Parasitoid wasp PAMPs amplify the transcriptional response of immune cells to danger signals

To understand the role of PAMPs in the cellular immune response we repeated the RNA-seq experiment on hemocytes. The number of uniquely mapped exonic reads ranged from 2,520,358 to 22,036,188 (Table 1B). There is a much broader

210  
211  
212  
213  
214  
215  
216  
217  
218  
219  
220  
221  
222  
223  
224  
225  
226  
227



228 transcriptional change in hemocytes than in the fat body (Figure 3A), with 3,887  
229 genes being differentially expressed after larvae were injected with wasp  
230 homogenate (Figure 3A, Figure S2). The genes that were significantly  
231 differentially expressed when larvae were injected with mineral oil alone were  
232 largely a subset of these genes (Figure 3A). The wasp homogenate and mineral  
233 oil injections are largely causing the same genes to change in expression, but the  
234 magnitude of the transcriptional response is greater in the presence of the PAMP  
235 (Figure 3B). Therefore, the PAMP amplifies the response to a danger signal.

236  
237 The massive transcriptional response of hemocytes may reflect the  
238 differentiation of lamellocytes, which are rare in homeostasis but increase after  
239 wasp infection. Genes upregulated by wasp homogenate were enriched for  
240 biological adhesion and cytoskeleton organization, which may be related to the  
241 role of lamellocytes in capsule formation and the changes in cell morphology that  
242 occur as these cells differentiate (Figure S3A). The upregulated genes were also  
243 enriched for endocytosis, macroautophagy and other immune functions (Table  
244 S3) [25]. In contrast, genes downregulated by wasp homogenate were enriched  
245 for extracellular structure organization, a housekeeping function of  
246 plasmatocytes (Figure S3A).

247 To test whether these transcriptional changes were linked to the differentiation  
248 of lamellocytes, we compared our data to previous results we have generated  
249 using single-cell RNA sequencing (scRNA-seq) [26]. We found that genes that  
250 were highly expressed in lamellocytes were upregulated by injecting wasp  
251 homogenate and vice-versa for downregulated genes (Figure S3B). To  
252 investigate this further, we estimated the abundance of different hemocyte types  
253 using digital cytometry [27]. This is a statistical technique that estimate cell  
254 proportions in 'bulk' RNA-seq data using the single cell expression profile [26] as  
255 a reference. We estimated that there was a moderate increase in the proportion  
256 of lamellocytes following the injection of an oil droplet (Figure 3C). However, the  
257 injection of wasp homogenate led to the differentiation of mature lamellocytes  
258 (LAM3) together with large numbers of immature lamellocytes (Figure 3C).

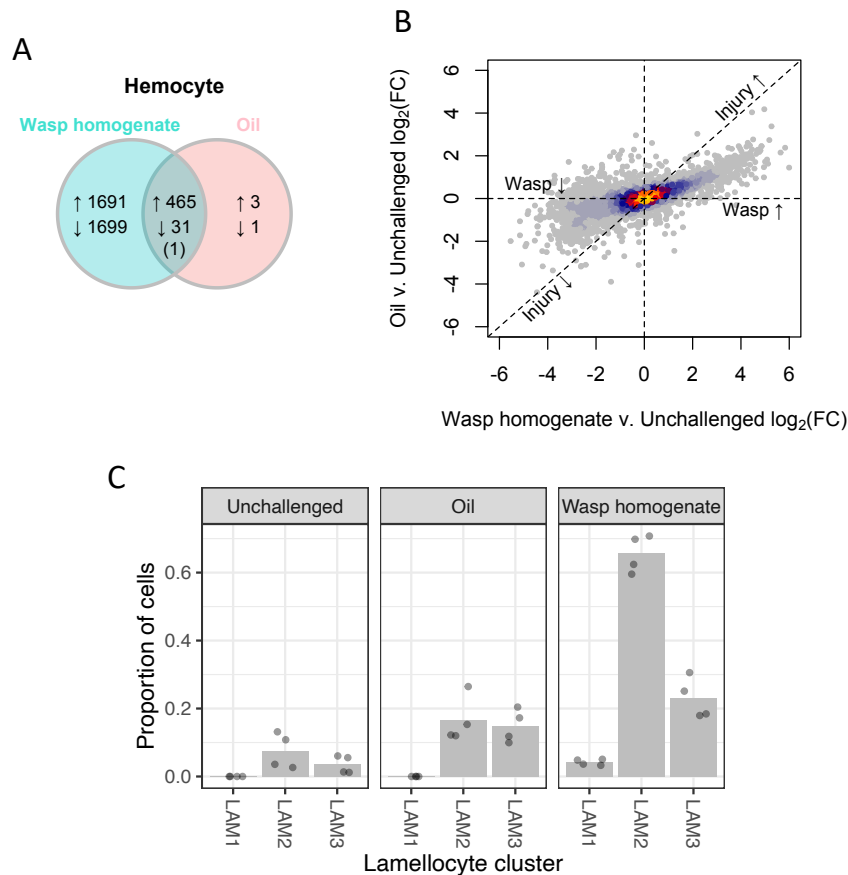

259  
 260  
 261  
 262  
 263  
 264  
 265  
 266  
 267  
 268  
 269  
 270

**Figure 3. Transcriptional response of hemocytes to wasp exposure** Larvae were injected with oil, wasp + oil or unchallenged. RNA from the hemocytes was sequenced 24h post treatment. (A) The number of genes with significantly changes in expression compared with unchallenged conditions. (B) Changes in gene expression induced by injection of wasp homogenate (x-axis) and by injection of oil (y-axis). Because both treatments cause injury, genes solely regulated by injury will be close to the dashed diagonal 1:1 line. Genes specifically activated by wasp PAMPs will be on the x-axis. Relative expression is represented as  $\log_2(\text{Fold Change})$ . (C) Inferred proportion of immature (LAM1 and LAM2) and mature (LAM3) lamellocytes estimated from the RNA-seq data using digital cytometry. Each point is an independent sample and the bars are the mean.

271  
 272  
 273  
 274  
 275

### ***Drosophila melanogaster* has evolved to recognize parasitoid-specific molecules**

276 To test if *Drosophila* larvae have evolved to recognize parasitoid-specific  
 277 molecules, we injected fly larvae with homogenates from prepared from 44  
 278 insect species and examined whether they activated the melanization response  
 279 to oil droplets. The two parasitoid species resulted in the two highest  
 280 melanization rates of all 44 species, and this parasitoid-specific response was  
 281 significant after correcting for the phylogenetic relatedness of the 44 species  
 282 (Figure 4; phylogenetic mixed model:  $p=0.006$ ). Therefore, the *Drosophila*

283 immune system appears to have evolved a specific mechanism to recognize  
 284 parasitoids.

285  
 286 Despite this parasitoid-specific response, homogenates of many other insect  
 287 species cause some level of immune activation (Figure 4). It is striking that  
 288 species closely related to *D. melanogaster* do not activate the melanization  
 289 response (Figure 4; 95% confidence intervals overlap the dashed line basal  
 290 response). Therefore, it appears that many insect species contain factors that  
 291 cause some activation of the melanization response, but *Drosophila* immunity is  
 292 not activated by self.

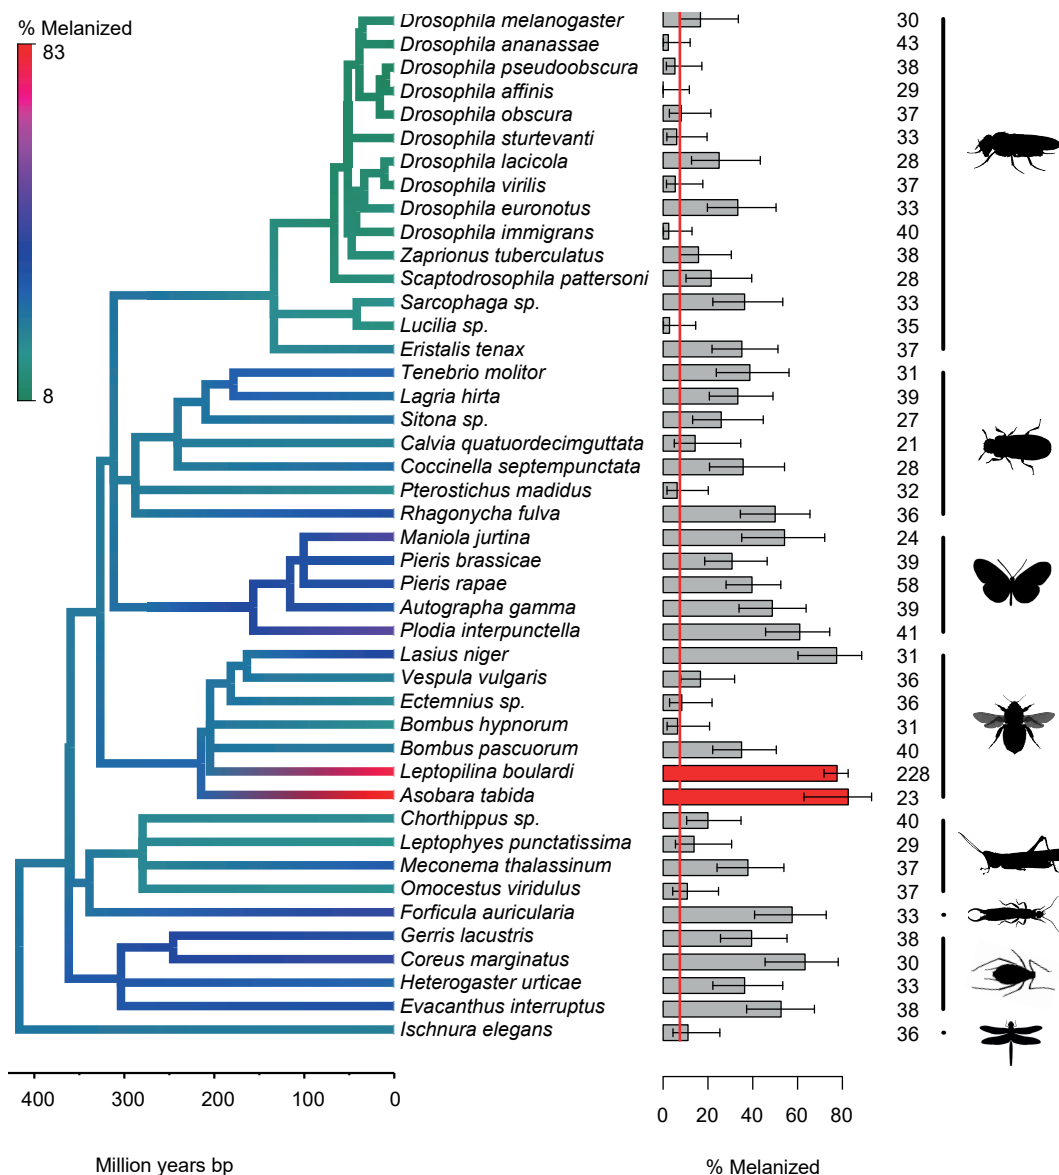

293  
 294  
 295  
 296  
 297  
 298  
 299  
 300  
 301

**Figure 4. The effect of injecting homogenates of different insects on the melanization of oil droplets.** The bar chart shows the proportion of oil droplets that were melanized with 95% binomial confidence intervals. The red line is the rate at which oil droplets were melanized without any insect homogenate ( $N=241$ ). The red bars are parasitoids of *D. melanogaster*. Sample sizes are given beside the bars. The silhouettes represent different insect orders (from top: Diptera, Coleoptera, Lepidoptera, Hymenoptera, Orthoptera, Dermaptera, Hemiptera, Odonata).

302

303

## 304 **Discussion**

305

306 Immune responses are multistep processes that require several levels of  
307 regulation. Here, we describe how the immune response of *D. melanogaster*  
308 against parasitoid wasps is regulated by two modes of immune activation. In line  
309 with previous results [12], immune challenge with an inert object induces the  
310 differentiation of lamellocytes. The signal required for this is likely a damage  
311 associated molecular pattern (DAMP) produced during wounding [28]. However,  
312 the final step of the encapsulation response—melanization—only occurs when  
313 wasp molecules are present. This suggests that this part of the encapsulation  
314 response is activated by a pathogen associated molecular pattern (PAMP). This  
315 PAMP has different effects on the two main immune tissues of *Drosophila*. In  
316 hemocytes, it enhances the differentiation of lamellocytes, amplifying the effects  
317 wounding. In the fat body it triggers the upregulation of a small number of  
318 humoral immune genes whose expression is not affected by wounding alone.  
319 This includes the secreted complement-like molecule TEP1, which we show is  
320 required for the melanization response.

321

322 The reason why this immune response relies on both PAMPs and DAMPs is  
323 unknown. However, the PAMP may be used to adjust the immune response to  
324 target this specific parasite, as wounding may occur for many other reasons.  
325 Alternatively, it may allow the response to be modulated according to the levels  
326 of infection (although this may be less relevant to parasitoids than other forms of  
327 infection). This regulation step may be important for the fly to minimize costs  
328 associated with the activation of the melanization cascade. Artificial activation of  
329 the melanization response is detrimental for host tissue physiology [29], while  
330 the production of lamellocytes, that is enhanced by the PAMP, is thought to be  
331 energetically costly for the fly [30]. Without this step of immune regulation, any  
332 cuticular wound would result in activation of the melanization cascade and incur  
333 associated costs.

334

335 Homogenates prepared with other insect species can also result in melanization,  
336 but parasitoid wasps induce the highest response. This variation in the  
337 phenotype may be the result of recognition of different molecules or different  
338 quantities of the same molecule in different species. It is worth noticing that  
339 homogenates prepared with other *Drosophila* species induce a very poor  
340 response. This is in contrast with a previous report that shows encapsulation  
341 and melanization of fat bodies from heterospecific tissue transplants when the  
342 donor is a *Drosophila* species outside the melanogaster group [31]. In this case,  
343 host larvae are mutants in an unidentified gene that causes the differentiation of  
344 lamellocytes in homeostasis, possibly explaining the discrepancy with the results  
345 presented here.

346

347 All major macromolecules, proteins, carbohydrates, nucleic acids, and lipids can  
348 act as PAMPs [1], and the crude wasp homogenate used in our experiments  
349 includes all these molecules. However, we found that treatment with proteinase  
350 K reduces the activity of the PAMP, suggesting that the active molecule may be a

351 protein or glycoprotein. Unexpectedly, the proteinase K was only effective if the  
352 wasps were autoclaved prior to homogenization. This suggests that the wasp  
353 protein may be resistant to proteinase K digestion. Proteinase K resistant  
354 proteins are rare [32] but they include some eukaryotic proteins [33]. The high  
355 temperature treatment may have modified the configuration of the wasp PAMP  
356 and made it accessible to proteinase K digestion.

357

358 In conclusion, we show that *Drosophila's* immune system can recognize the  
359 presence of wasp parasites and uses this recognition to modulate the cellular  
360 and humoral responses that are initiated by injury. To our knowledge, this is the  
361 first report of an animal immune system recognizing a PAMP from a parasite that  
362 is closely related to itself.

363

## 364 **Material and methods**

365

366 *D. melanogaster* and *L. boulardi* maintenance

367 For all experiments except RNAi we used an outbred *D. melanogaster* population  
368 that was established from 372 isofemales caught in Cambridgeshire in October  
369 2017. Population size was maintained over 500 flies per generation and had over  
370 10 generations of laboratory adaptation before the start of experiments. For  
371 experimental procedures, flies were allowed to lay eggs overnight on agar plates  
372 covered with yeast (*Saccharomyces cerevisiae* – Sigma YSC2). Eggs were washed  
373 from the agar plate with PBS and transferred into 1.5ml microcentrifuge tubes.  
374 13µl of eggs and PBS (~150 eggs) were transferred onto 50mm cornmeal food  
375 plates. These were incubated for 72 hours before experiments. Developing and  
376 adult *D. melanogaster* were maintained at 25°C, 70% relative humidity in an 8h-  
377 16h dark-light cycle.

378

379 *L. boulardi* was maintained by allowing females to infect 1<sup>st</sup> instar larvae of the  
380 outbred population and incubating them at 25°C. Adult wasps were collected 24  
381 days after infection and maintained at room temperature with a drop of honey  
382 for up a maximum of 5 days before infections. To infect *D. melanogaster* larvae, 3  
383 *L. boulardi* females were allowed to infect larvae on the cornmeal food plates for  
384 3 hours.

385

386 RNAi

387 The following *D. melanogaster* stocks were obtained from the Bloomington  
388 Drosophila Stock Center: UAS- Tep1<sup>dsRNA</sup> (BL#: 32856), UAS-EGFP<sup>dsRNA</sup> (BL#:  
389 41556) and dauterless-GAL4 (da-GAL4, BL#: 27608). Balancer chromosomes  
390 from stock 27608 were substituted with autosomes from stock w<sup>1118</sup>. Females  
391 from the ubiquitously expressed GAL4 driver, da-GAL4, were crossed with males  
392 from both UAS-dsRNA lines. Larvae from this cross were injected and analyzed  
393 as described below.

394

395 Insect species

396 We used 44 species of insects to test if they activated the melanization response.  
397 Drosophilid species (kind gift from Ben Longdon), *A. tabida* strain SFA3  
398 (collected in Sainte Foy-Lès-Lyon, Rhône, France in 2012 and provided by  
399 Fabrice Vavre) and *L. boulardi* strain G486 [34] were lab maintained stocks. All



400 other species were collected in Cambridge, UK, in July 2018 and identified  
401 morphologically. For large species a single specimen was collected, while for  
402 smaller species multiple individuals were pooled.

403

#### 404 Oil Injections

405 To test whether insect extracts could activate the immune response, we  
406 homogenized insects in paraffin oil. Our initial characterization of wasp extracts  
407 used 20 female *L. bouleardi* in 200 $\mu$ l of paraffin oil (Sigma-Aldrich M5904;  
408 approximately 0.025mg wasp/ $\mu$ l oil). In the experiment involving multiple  
409 species, specimens were weighed and paraffin oil was added to reach a  
410 concentration of 0.025mg/ $\mu$ l. For large specimens the thorax was used, while for  
411 small specimens the entire animal was used (body part did not have a significant  
412 effect on melanization rates). Specimens were homogenized in the paraffin oil  
413 with a pestle in 0.5ml microcentrifuge tubes. To remove large particles, the  
414 solution was centrifuged for 1min at 300g and the supernatant was transferred  
415 to a new 0.5ml microcentrifuge tube.

416

417 Borosilicate glass 3.5" capillaries (Drummond Scientific Co. 3-000-203-G/X)  
418 were pulled to form thin needles in a needle puller (Narishige PC-10). The needle  
419 was backfilled with the oil solution with a syringe and attached to a nanoinjector  
420 (Drummond Scientific Co. Nonoject II). Late 2<sup>nd</sup> instar and early 3<sup>rd</sup> instar larvae  
421 were carefully removed with forceps from cornmeal food plates and placed on  
422 filter paper, in groups of 10. Larvae were carefully injected with 4.6nl of solution.  
423 After injection, ddH<sub>2</sub>O was added with a brush to remove the larvae and 40  
424 larvae were transferred into a cornmeal food vial at 25°C, 70% relative humidity  
425 and an 8:16 dark:light cycle. After 48 hours larvae were removed with a 15%  
426 w/v sugar solution and scored for total melanization of the oil droplet.

427

#### 428 Hemocyte counts

429 To count hemocytes, larvae were injected as described above. After 48 hours,  
430 injected and control larvae were collected, washed in PBS, dried on filter paper  
431 and pooled in groups of 8 to 10 larvae in a well of a multi-well porcelain plate.  
432 Larvae were rapidly dissected with a pair of forceps from the ventral side.  
433 Hemolymph was recovered with a 1-10 $\mu$ l micropipette and transferred into a  
434 0.5ml microcentrifuge tube. 1 $\mu$ l of hemolymph was collected, diluted in 9 $\mu$ l of  
435 Neutral Red solution (1.65g/L PBS – Sigma-Aldrich N2889) and thoroughly  
436 mixed. The hemolymph dilution was transferred into a counting Thoma chamber  
437 (Marienfeld #0640711) and hemocytes were counted in a total volume of 0.1 $\mu$ l  
438 with a 40x objective (Leica DM750). Lamellocytes were distinguished from  
439 plasmatocytes and crystal cells by morphology.

440

#### 441 RNA sequencing

442 We performed RNA-seq on flies injected with wasp homogenate or oil droplets  
443 and unchallenged flies. Hemocytes from ~100 larvae were pooled in 100 $\mu$ l of  
444 PBS, 24 hours after injections. Fat body samples were dissected from 8 third  
445 instar larvae and pooled in 100 $\mu$ l of PBS. RNA was purified from hemolymph or  
446 fat body samples in an identical manner: 1ml TRIzol [Ambion: 15596018] was  
447 added to collected tissue and the samples were homogenized by pipetting  
448 several times. 200 $\mu$ l of chloroform [Fisher Scientific: C/4920/08] was added;

449 samples were shaken for 15 seconds, incubated at room temperature for 3  
450 minutes then centrifuged at 12,000g for 10 minutes at 4°C. The upper aqueous  
451 phase (approximately 500ul) was removed to a fresh tube and RNA was  
452 precipitated by adding 2.5 volumes of isopropanol and incubated at -20°C for 1  
453 hour. RNA was pelleted by centrifugation, washed with 70% ethanol, and re-  
454 suspended in 15ul of nuclease free water [Ambion: AM9930]. RNA was  
455 quantified by Qubit fluorometer2.0 [ThermoFisher Scientific: Q32866] with the  
456 Qubit RNA HS Assay Kit [ThermoFisher Scientific: Q32852] and integrity was  
457 assessed by gel electrophoresis. 100-4,000ng of RNA was used for RNA-Seq  
458 library preparation.

459  
460 Libraries were prepared using the KAPA Stranded mRNA-Seq Kit Illumina®  
461 platform. TrueSeq DNA Low Throughput adaptors used were from Illumina®  
462 TruSeq™ KAPA Si adaptor kit KK8701 and adaptor concentrations and the  
463 number of PCR cycles used to amplify the final libraries were adjusted to the  
464 total amount of RNA used for each library. Seven hemocyte libraries that gave a  
465 low final concentration (<2ng/ul) were re-amplified for four more cycles. Quality  
466 control of the libraries to ensure no adapter dimers were present was carried  
467 out by examining 1ul of a 1:5 dilution on a High Sensitivity DNA chip (Agilent  
468 Technologies: 5067-4626) on an Agilent 2100 Bioanalyzer. The average library  
469 size including adapters was 350bp. Sequencing was carried out at the Cancer  
470 Research UK Cambridge Institute in June 2019. All 24 libraries were multiplexed  
471 and sequenced on one lane of HiSeq4000 using 50bp single end reads.

472  
473 Differential expression tests  
474 Sequenced RNA-seq reads were trimmed and aligned to the *D. melanogaster*  
475 genome and reads counts per gene were estimated. Using Trimmomatic v.0.36  
476 [35], we clipped adaptors sequences, removed the first three and last three  
477 bases, filtered strings of low-quality bases found in 4bp sliding windows where  
478 quality dropped below 20 and ensured that the remaining reads had a minimum  
479 size of 36bp. We mapped the resulting reads using STAR v2.6 [36] to the *D.*  
480 *melanogaster* reference (r6.28) [37] attained from Flybase (FB2019\_02) [38]. We  
481 prepared the genome for STAR mapping using a sjdbOverhang of 49. Then, we  
482 mapped reads using the basic option for the twopassMode parameter, filtered  
483 multi-mapped reads and sorted the remainder by coordinates. We used  
484 featureCounts [39] to compute read counts for genes using their Flybase IDs. We  
485 only considered reads with a minimum quality score of 10.

486  
487 We performed differential expression tests for the fat body and hemocyte  
488 libraries separately using edgeR v.3.24.3 [40,41] and limma v.3.38.3 [42]. We  
489 only kept genes that had CPM greater than or equal to 2 in at least four samples  
490 for a given tissue. We normalized read counts using trimmed mean of M-values.  
491 For a given tissue, we had four replicate libraries for each of three groups: wasp  
492 homogenate, oil and unchallenged. Salivary gland and male germ tissues were  
493 difficult to exclude completely when dissecting larvae and isolating the fat body  
494 of *D. melanogaster*. To minimize noise in our differential expression tests  
495 attributable to this limitation, we excluded genes that had enriched expression in

496 the aforementioned tissues. We obtained tissue level RNA-seq expression data  
497 from FlyAtlas2 [43] and calculate the tissue specificity index (Tau) [44] for each  
498 gene in the larvae and adult males separately. We then excluded tissue-specific  
499 fat body expressed genes ( $\text{Tau} > 0.8$ ) with greatest expression either in the larval  
500 salivary gland or adult male testes. We only excluded genes that had FPKM  $> 1$  in  
501 either of those two tissues in FlyAtlas2. We fit a linear model using limma  
502 contrasting gene expression among the three groups (full model in script). After  
503 checking that the mean-variance trends followed the expected dispersion, we fit  
504 contrasts and used the *eBayes* function to uncover genes with evidence of  
505 significant differential expression between the wasp homogenate and  
506 unchallenged comparison and the oil and unchallenged comparison separately.  
507 We used the *heatscatter* function from the LSD v.4 R package to compare the  
508  $\log_2\text{FC}$  in expression between the two comparisons. We then extracted genes  
509 with  $P$ -values of less than 0.05 after a false discovery rate (FDR) correction. For a  
510 few of these genes, we divided counts per million reads (CPM) for each library by  
511 the overall total across all libraries per gene to compare expression levels across  
512 samples. We plotted a heatmap of relative gene expression using the pheatmap  
513 v.1.0.12 R package. Serine proteases were named according to [45].  $\log_2\text{CPM}$   
514 counts for all genes (unfiltered) in hemocyte and fat body tissues is accessible  
515 from the following gene expression browser  
516 <https://arunkuma.shinyapps.io/waspapp/> (last accessed June 2022). We  
517 performed gene ontology (Huang et al., 2009) enrichment analyses on the  
518 differentially expressed genes using Flymine [46]. The genes detected in each  
519 tissue was used as the background list. Non-redundant gene ontology terms  
520 were identified using REVIGO [47] keeping FDR  $P$ -values  $< 0.05$  and similarity =  
521 0.4.

522

#### 523 Bulk RNA-seq deconvolution

524 We used the digital cytometric method CIBERSORTx [27] to infer the proportion  
525 of hemocyte clusters, which were identified in [26], in the bulk RNA-seq data. We  
526 first created a signature matrix using read counts from 2,000 highly variable  
527 genes in the scRNA-seq. Between 300 to 500 genes were used for barcoding cell  
528 types and a  $q$ -value of 0.01 was used to test for the significance of differential  
529 gene expression. Quantile normalization was disabled as recommended and a  
530 maximum conditional number of 999 was used by default. Only genes with  
531 average  $\log_2$  expression of 0.5 were analysed. Five replicates were used to build  
532 the scRNA-seq reference file. Half of available gene expression profiles were  
533 randomly selected to generate the file. Then, we imputed cell fractions using the  
534 bulk RNA-seq read counts from hemocyte libraries with an S-mode batch  
535 correction and used 100 permutations to assess the significance of cluster  
536 inferences.

537

#### 538 Gene expression by qPCR

539 To analyze the expression by qPCR, RNA was extracted from pools of 10 larvae,  
540 48 hours post injection. Larvae were homogenized in 250 $\mu\text{l}$  TRIzol [Ambion  
541 15596018] with  $\sim 10$  1.0mm zirconia beads [Thistle Scientific] in a tissuelyser  
542 [Retsch MM300] and kept at  $-80^\circ\text{C}$ . For RNA extraction, samples were defrosted  
543 and centrifuged for 10min at  $4^\circ\text{C}$  at 12,000g. 160 $\mu\text{l}$  of supernatant was  
544 transferred into 1.5ml microcentrifuge tubes, 62.5 $\mu\text{l}$  of chloroform [Fisher



545 Scientific C/4920/08] was added, tubes were shaken for 15s and incubated for  
546 3min. After a 10min centrifugation at 12,000g at 4°C, 66µl of the aqueous phase  
547 was transferred into a 1.5µl microcentrifuge tube, 156µl of isopropanol  
548 [Honeywell 33539] added and the solution thoroughly mixed. After 10min  
549 incubation samples were centrifuged for 10min at 12,000g at 4°C and the  
550 supernatant was removed. RNA was washed with 250µl 70% ethanol,  
551 centrifuged for 2min at 12,000g at 4°C. Ethanol was removed, samples dried,  
552 20µl of nuclease free water [Ambion AM9930] was added and samples incubated  
553 at 45°C for 10min. cDNA was prepared from RNA samples with GoScript reverse  
554 transcriptase (Promega) according to manufacturer instructions. cDNA was  
555 diluted 1:10. Exonic primers for *D. melanogaster* immunity genes were designed  
556 in NCBI Primer-BLAST online tool (Table S4). The gene *RpL32* was used to  
557 normalize gene expression (RpL32\_qPCR\_F-d: 5'-TGCTAAGCTGTGCGACAAATGG-  
558 3'; RpL\_qPCR\_R-h 5'- TGGCCTTGTTCGATCCGTAAC-3'; Longdon et al. 2011).  
559 Sensifast Hi-Rox SyBr kit [Bioline, BIO-92005] was used to perform the RT-qPCR  
560 on a StepOnePlus system [Applied Biosystems]. Each sample was duplicated  
561 (qPCR technical replica). The PCR cycle was 95°C for 2min followed by 40 cycles  
562 of 95°C for 5s, 60°C for 30s. For one experimental replicate, we averaged the  
563 cycle threshold (*Ct*) values of 4 biological replicates (groups of 10 larvae). The  
564 relative expression of the gene of interest (GOI) was calculated as  $2^{-\Delta\Delta Ct}$ , where  
565  $\Delta\Delta Ct = (Ct_{GOI(Treatment)} - Ct_{RpL32(Treatment)}) - (Ct_{GOI(Control)} - Ct_{RpL32(Control)})$ .

566

#### 567 Statistical analysis

568 The effects of different treatments on oil droplet melanization were analyzed  
569 with a quasibinomial generalized linear model, with the ratio of melanized to  
570 non-melanized oil droplets as a response and treatment as a fixed effect. We  
571 used Tukey's honest significant difference test to compare treatments. To test  
572 differences in lamellocyte numbers with different treatments we used a one-way  
573 ANOVA with Tukey's test to compare treatments. We compared gene expression  
574 ( $2^{-\Delta\Delta Ct}$ ) using a two-tailed *t*-test, correcting *P*-values with the Bonferroni method.

575

576 We used a phylogenetic mixed model to analyze the effect of extracts of 44 insect  
577 species on oil droplet melanization. This allowed us both to reconstruct ancestral  
578 states across a phylogeny, and test whether *Drosophila* has evolved to  
579 specifically recognized parasitoid wasps after correcting for the confounding  
580 effect of the insect phylogeny. The ratio of melanized to non-melanized oil  
581 droplets was the binomial response variable. Whether or not the insect was a  
582 parasitoid was treated as a fixed effect. The phylogeny was treated as a random  
583 effect, which allows the correlation between two species to be inversely  
584 proportional to the time since those species shared a common ancestor  
585 (following a Brownian model of evolution). A residual variance allowed for  
586 differences between species that are unrelated to the phylogeny. We used the  
587 phylogeny of the 44 insect species available through TimeTree (Kumar et al.  
588 2017). The model was fitted using a Bayesian approach using MCMCglmm  
589 (Hadfield 2010) using an inverse gamma prior. We ran  $10^6$  burn-in iterations  
590 followed  $10^7$  iterations, sampling every  $10^4$  iterations.

591

592 R v3.6/4 [49] and RStudio v1.2.5042 [50] were widely used for generating  
593 figures.

594

### 595 **Author's contributions**

596 F.J. and A.B.L. conceived the study. N.H., A.D., J.P.D. and A.B.L. collected data.  
597 M.P.H collected and identified the insect species. R.A., A.B.L. and F.J. analyzed the  
598 data. All authors contributed to interpret the data and write the manuscript.

599

### 600 **Funding**

601 This work was funded by a Natural Environment Research Council grant  
602 (NE/P00184X/1) to FJ and ABL. ABL was also supported by the European  
603 Molecular Biology Organization fellowship (ALT-1556) and RA was supported by  
604 the Natural Sciences and Engineering Research Council of Canada fellowship  
605 (PDF-516634-2018). NH was supported by the Balfour-Browne Fund and MPH  
606 by the Stephen Johnson Undergraduate Research Bursary.

607

### 608 **Data availability**

609 Raw and processed data files used to generate figures and the lists of  
610 differentially expressed genes are available in NERC EDS Environmental  
611 Information Data Centre ([https://doi.org/10.5285/06ea87f3-476d-40fd-acce-](https://doi.org/10.5285/06ea87f3-476d-40fd-acce-e6923e786d48)  
612 [e6923e786d48](https://doi.org/10.5285/06ea87f3-476d-40fd-acce-e6923e786d48)). Scripts to analyze data are available in the Github (DOI:  
613 10.5281/zenodo.6684609). Paired end reads from oil and wasp injections were  
614 deposited into the NCBI Sequence Read Archive (SRA) and can be accessed with  
615 Bioproject ID PRJNA685781.

616

617

- 618 1. Takeuchi O, Akira S. Pattern Recognition Receptors and Inflammation. *Cell*.  
619 2010. doi:10.1016/j.cell.2010.01.022
- 620 2. Turvey SE, Broide DH. Innate immunity. *J Allergy Clin Immunol*. 2010;125:  
621 S24–S32. doi:<https://doi.org/10.1016/j.jaci.2009.07.016>
- 622 3. Medzhitov R, Janeway CA. Decoding the patterns of self and nonself by the  
623 innate immune system. *Science*. 2002. doi:10.1126/science.1068883
- 624 4. Murgia C, Pritchard JK, Kim SY, Fassati A, Weiss RA. Clonal Origin and  
625 Evolution of a Transmissible Cancer. *Cell*. 2006;126: 477–487.  
626 doi:10.1016/j.cell.2006.05.051
- 627 5. Hegenauer V, Fürst U, Kaiser B, Smoker M, Zipfel C, Felix G, et al. Detection  
628 of the plant parasite *Cuscuta reflexa* by a tomato cell surface receptor.  
629 *Science* (80- ). 2016;353. doi:10.1126/science.aaf3919
- 630 6. Hegenauer V, Slaby P, Körner M, Bruckmüller JA, Burggraf R, Albert I, et al.  
631 The tomato receptor CuRe1 senses a cell wall protein to identify *Cuscuta*  
632 as a pathogen. *Nat Commun*. 2020;11. doi:10.1038/s41467-020-19147-4
- 633 7. Forbes AA, Bagley RK, Beer MA, Hippee AC, Widmayer HA. Quantifying the  
634 unquantifiable : why Hymenoptera, not Coleoptera, is the most speciose  
635 animal order. *BMC Ecol*. 2018;18: 1–11. doi:10.1186/s12898-018-0176-x
- 636 8. Carton Y, Poirié M, Nappi AJ. Insect immune resistance to parasitoids.  
637 *Insect Sci*. 2008;15: 67–87. doi:10.1111/j.1744-7917.2008.00188.x
- 638 9. Reed DA, Luhning KA, Stafford CA, Hansen AK, Millar JG, Hanks LM, et al.  
639 Host defensive response against an egg parasitoid involves cellular  
640 encapsulation and melanization. *Biol Control*. 2007;41: 214–222.  
641 doi:10.1016/j.biocontrol.2007.01.010
- 642 10. Hu J, Zhu XX, Fu WJ. Passive evasion of encapsulation in *Macrocentrus*

- 643 cingulum Brischke (Hymenoptera: Braconidae), a polyembryonic  
644 parasitoid of *Ostrinia furnacalis* Guenée (Lepidoptera: Pyralidae). *J Insect*  
645 *Physiol.* 2003;49: 367–375. doi:10.1016/S0022-1910(03)00021-0
- 646 11. Dudzic J, Kondo S, Ueda R. *Drosophila* innate immunity: regional and  
647 functional specialization of prophenoloxidases. *BMC Biol.* 2015 [cited 3  
648 Nov 2016]. Available: <http://www.biomedcentral.com/1741-7007/13/81>
- 649 12. Márkus R, Kurucz E, Rus F, Andó I. Sterile wounding is a minimal and  
650 sufficient trigger for a cellular immune response in *Drosophila*  
651 *melanogaster*. *Immunol Lett.* 2005;101: 108–11.  
652 doi:10.1016/j.imlet.2005.03.021
- 653 13. Salt G. The Cellular Defence Reactions of Insects. *The Cellular Defence*  
654 *Reactions of Insects.* 1970. doi:10.1017/cbo9780511721960
- 655 14. Dubuffet A, Doury G, Labrousse C, Drezen J-M, Carton Y, Marylène P.  
656 Variation of success of *Leptopilina boulardi* in *Drosophila yakuba* : The  
657 Variation of success of *Leptopilina boulardi* in *Drosophila yakuba* : The  
658 mechanisms explored. *Dev Comp Immunol.* 2008;32: 597–602.  
659 doi:10.1016/j.dci.2007.10.009
- 660 15. Cavigliasso F, Gatti JL, Colinet D, Poirié M. Impact of temperature on the  
661 immune interaction between a parasitoid wasp and *drosophila* host  
662 species. *Insects.* 2021;12: 1–21. doi:10.3390/insects12070647
- 663 16. SALT G. Experimental studies in insect parasitism. IX. The reactions of a  
664 stick insect to an alien parasite. *Proc R Soc Lond B Biol Sci.* 1956;146.  
665 doi:10.1098/rspb.1956.0075
- 666 17. Moreau SJM, Eslin P, Giordanengo P, Doury G. Comparative study of the  
667 strategies evolved by two parasitoids of the genus *Asobara* to avoid the  
668 immune response of the host, *Drosophila melanogaster*. *Dev Comp*  
669 *Immunol.* 2003;27: 273–282. doi:10.1016/S0145-305X(02)00101-5
- 670 18. Choi HW, Manohar M, Manosalva P, Tian M, Moreau M, Klessig DF.  
671 Activation of Plant Innate Immunity by Extracellular High Mobility Group  
672 Box 3 and Its Inhibition by Salicylic Acid. *PLoS Pathog.* 2016;12: 1–21.  
673 doi:10.1371/journal.ppat.1005518
- 674 19. EBELING W, HENNRICH N, KLOCKOW M, METZ H, ORTH HD, LANG H.  
675 Proteinase K from *Tritirachium album* Limber. *Eur J Biochem.* 1974;47:  
676 91–97. doi:10.1111/j.1432-1033.1974.tb03671.x
- 677 20. Lemaitre B, Hoffmann J. The host defense of *Drosophila melanogaster*.  
678 *Annu Rev Immunol.* 2007;25: 697–743.  
679 doi:10.1146/annurev.immunol.25.022106.141615
- 680 21. Clemmons AW, Lindsay SA, Wasserman SA. An Effector Peptide Family  
681 Required for *Drosophila* Toll-Mediated Immunity. *PLoS Pathog.* 2015;11.  
682 doi:10.1371/journal.ppat.1004876
- 683 22. Bou Aoun R, Hetru C, Troxler L, Doucet D, Ferrandon D, Matt N. Analysis of  
684 thioester-containing proteins during the innate immune response of  
685 *Drosophila melanogaster*. *J Innate Immun.* 2011;3: 52–64.  
686 doi:10.1159/000321554
- 687 23. Dostálová A, Rommelaere S, Poidevin M, Lemaitre B. Thioester-containing  
688 proteins regulate the Toll pathway and play a role in *Drosophila* defence  
689 against microbial pathogens and parasitoid wasps. *BMC Biol.* 2017; 1–16.  
690 doi:10.1186/s12915-017-0408-0
- 691 24. Blandin S, Shiao SH, Moita LF, Janse CJ, Waters AP, Kafatos FC, et al.

- 692 Complement-like protein TEP1 is a determinant of vectorial capacity in the  
693 malaria vector *Anopheles gambiae*. *Cell*. 2004;116: 661–670.  
694 doi:10.1016/S0092-8674(04)00173-4
- 695 25. Honti V, Csordás G, Kurucz É, Márkus R, Andó I. The cell-mediated  
696 immunity of *Drosophila melanogaster*: hemocyte lineages, immune  
697 compartments, microanatomy and regulation. *Dev Comp Immunol*.  
698 2014;42: 47–56. doi:10.1016/j.dci.2013.06.005
- 699 26. Leitão AB, Arunkumar R, Day JP, Geldman EM, Morin-Poulard I, Crozatier  
700 M, et al. Constitutive activation of cellular immunity underlies the  
701 evolution of resistance to infection in *Drosophila*. *Elife*. 2020;9.  
702 doi:10.7554/eLife.59095
- 703 27. Newman AM, Steen CB, Liu CL, Gentles AJ, Chaudhuri AA, Scherer F, et al.  
704 Determining cell type abundance and expression from bulk tissues with  
705 digital cytometry. *Nat Biotechnol*. 2019;37. doi:10.1038/s41587-019-  
706 0114-2
- 707 28. Kenmoku H, Hori A, Kuraishi T, Kurata S. A novel mode of induction of the  
708 humoral innate immune response in *Drosophila* larvae . *Dis Model Mech*.  
709 2017;10: 271–281. doi:10.1242/dmm.027102
- 710 29. Sadd BM, Siva-Jothy MT. Self-harm caused by an insect’s innate immunity.  
711 *Proc R Soc B Biol Sci*. 2006. doi:10.1098/rspb.2006.3574
- 712 30. Bajgar A, Kucerova K, Jonatova L, Tomcala A, Schneedorferova I, Okrouhlik  
713 J, et al. Extracellular Adenosine Mediates a Systemic Metabolic Switch  
714 during Immune Response. *PLoS Biol*. 2015;13: 1–23.  
715 doi:10.1371/journal.pbio.1002135
- 716 31. Rizki R, Rizki TM. Hemocyte Responses to Implanted Tissues in *Drosophila*  
717 *melanogaster* Larvae. *Hereditas*. 1980;250: 602–220. doi:10.1111/j.1601-  
718 5223.1977.tb01396.x
- 719 32. Butler GH, Kotani H, Kong L, Frick M, Evancho S, Stanbridge EJ, et al.  
720 Identification and characterization of proteinase K-resistant proteins in  
721 members of the class Mollicutes. *Infect Immun*. 1991;59: 1037–1042.  
722 doi:10.1128/iai.59.3.1037-1042.1991
- 723 33. Atkinson BG, Dean RL, Tomlinson J, Blaker TW. Rapid purification of  
724 ferritin from lysates of red blood cells using proteinase-K. *Biochem Cell*  
725 *Biol*. 1989;67: 52–57. doi:10.1139/o89-008
- 726 34. Dupas S, Frey F, Carton Y. A Single Parasitoid Segregating Factor Controls  
727 Immune Suppression in *Drosophila*. *J Hered*. 1998;89: 306–311.
- 728 35. Bolger AM, Lohse M, Usadel B. Trimmomatic: A flexible trimmer for  
729 Illumina sequence data. *Bioinformatics*. 2014;30: 2114–2120.  
730 doi:10.1093/bioinformatics/btu170
- 731 36. Dobin A, Davis CA, Schlesinger F, Drenkow J, Zaleski C, Jha S, et al. STAR:  
732 ultrafast universal RNA-seq aligner. *Bioinformatics*. 2013;29.  
733 doi:10.1093/bioinformatics/bts635
- 734 37. Hoskins RA, Carlson JW, Wan KH, Park S, Mendez I, Galle SE, et al. The  
735 Release 6 reference sequence of the *Drosophila melanogaster* genome.  
736 *Genome Res*. 2015;25. doi:10.1101/gr.185579.114
- 737 38. Thurmond J, Goodman JL, Strelets VB, Attrill H, Gramates LS, Marygold SJ,  
738 et al. FlyBase 2.0: the next generation. *Nucleic Acids Res*. 2019;47: D759–  
739 D765. doi:10.1093/nar/gky1003
- 740 39. Liao Y, Smyth GK, Shi W. featureCounts: an efficient general purpose

- 741 program for assigning sequence reads to genomic features. *Bioinformatics*.  
742 2014;30. doi:10.1093/bioinformatics/btt656
- 743 40. McCarthy DJ, Chen Y, Smyth GK. Differential expression analysis of  
744 multifactor RNA-Seq experiments with respect to biological variation.  
745 *Nucleic Acids Res.* 2012;40. doi:10.1093/nar/gks042
- 746 41. Robinson MD, McCarthy DJ, Smyth GK. edgeR: a Bioconductor package for  
747 differential expression analysis of digital gene expression data.  
748 *Bioinformatics.* 2010;26. doi:10.1093/bioinformatics/btp616
- 749 42. Ritchie ME, Phipson B, Wu D, Hu Y, Law CW, Shi W, et al. limma powers  
750 differential expression analyses for RNA-sequencing and microarray  
751 studies. *Nucleic Acids Res.* 2015;43: e47–e47. doi:10.1093/nar/gkv007
- 752 43. Leader DP, Krause SA, Pandit A, Davies SA, Dow JAT. FlyAtlas 2: a new  
753 version of the *Drosophila melanogaster* expression atlas with RNA-Seq,  
754 miRNA-Seq and sex-specific data. *Nucleic Acids Res.* 2018;46.  
755 doi:10.1093/nar/gkx976
- 756 44. Yanai I, Benjamin H, Shmoish M, Chalifa-Caspi V, Shklar M, Ophir R, et al.  
757 Genome-wide midrange transcription profiles reveal expression level  
758 relationships in human tissue specification. *Bioinformatics.* 2005;21.  
759 doi:10.1093/bioinformatics/bti042
- 760 45. Cao X, Jiang H. Building a platform for predicting functions of serine  
761 protease-related proteins in *Drosophila melanogaster* and other insects.  
762 *Insect Biochem Mol Biol.* 2018;103. doi:10.1016/j.ibmb.2018.10.006
- 763 46. Lyne R, Smith R, Rutherford K, Wakeling M, Varley A, Guillier F, et al.  
764 FlyMine: an integrated database for *Drosophila* and *Anopheles* genomics.  
765 *Genome Biol.* 2007;8: R129. doi:10.1186/gb-2007-8-7-r129
- 766 47. Supek F, Bošnjak M, Škunca N, Šmuc T. REVIGO Summarizes and Visualizes  
767 Long Lists of Gene Ontology Terms. *PLoS One.* 2011;6: e21800.  
768 doi:10.1371/journal.pone.0021800
- 769 48. Longdon B, Hadfield JD, Webster CL, Obbard DJ, Jiggins FM. Host  
770 Phylogeny Determines Viral Persistence and Replication in Novel Hosts.  
771 *PLoS Pathog.* 2011;7. doi:10.1371/journal.ppat.1002260
- 772 49. R Core Team. A language and environment for statistical computing. R  
773 Foundation for Statistical Computing, Vienna, Austria. [https://wwwR-](https://www.R-project.org/)  
774 [project.org/](https://www.R-project.org/). 2018.
- 775 50. RStudio Team. RStudio: Integrated Development for R. URL  
776 <http://www.rstudio.com/>. In: RStudio, PBC, Boston, MA URL  
777 <http://www.rstudio.com/>. 2020.  
778  
779



780  
781

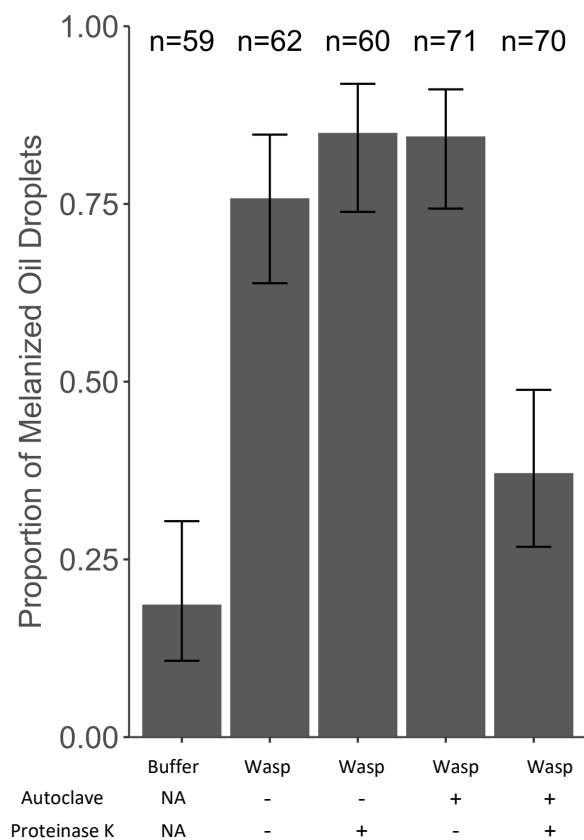

**Figure S1 – Treatment of wasp homogenate with proteinase K.** Larvae were injected with oil after a first injection with buffer or wasp homogenate. Wasps were autoclaved (+) or immediately frozen (-) before homogenization in buffer. Wasp homogenates were then treated with proteinase K (+) or incubated without proteinase K (-) before injection. Number of phenotyped larvae is shown and error bars represent standard error.

782  
783

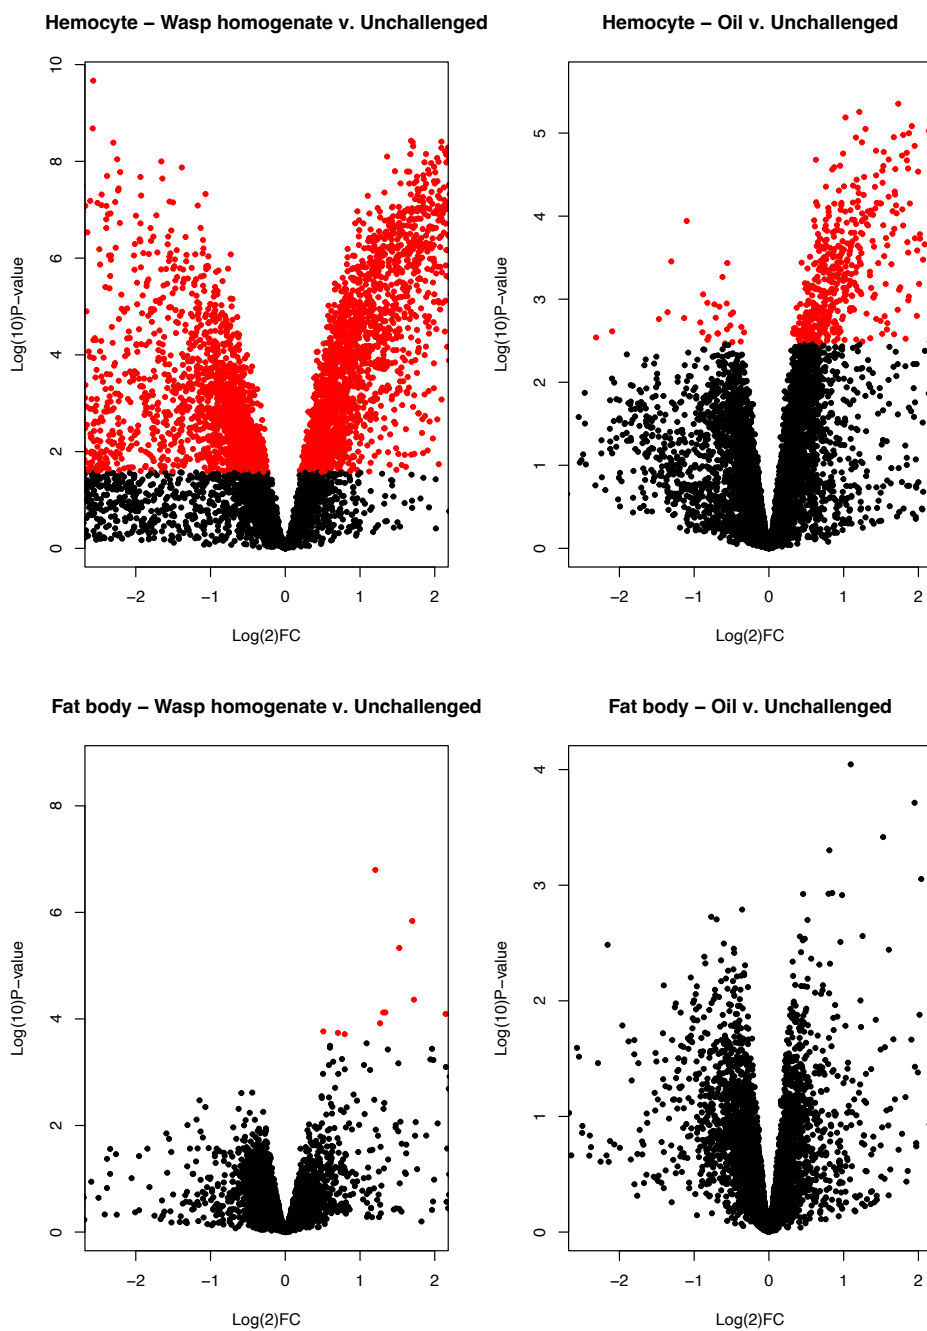

**Figure S2. Volcano plots contrasting  $\log_2$  fold change in gene expression against  $P$ -values generated from differential expression tests, for hemocyte and fat body samples. Red points indicate genes with false-discovery rate corrected  $P$ -values < 0.05.**

784  
785  
786

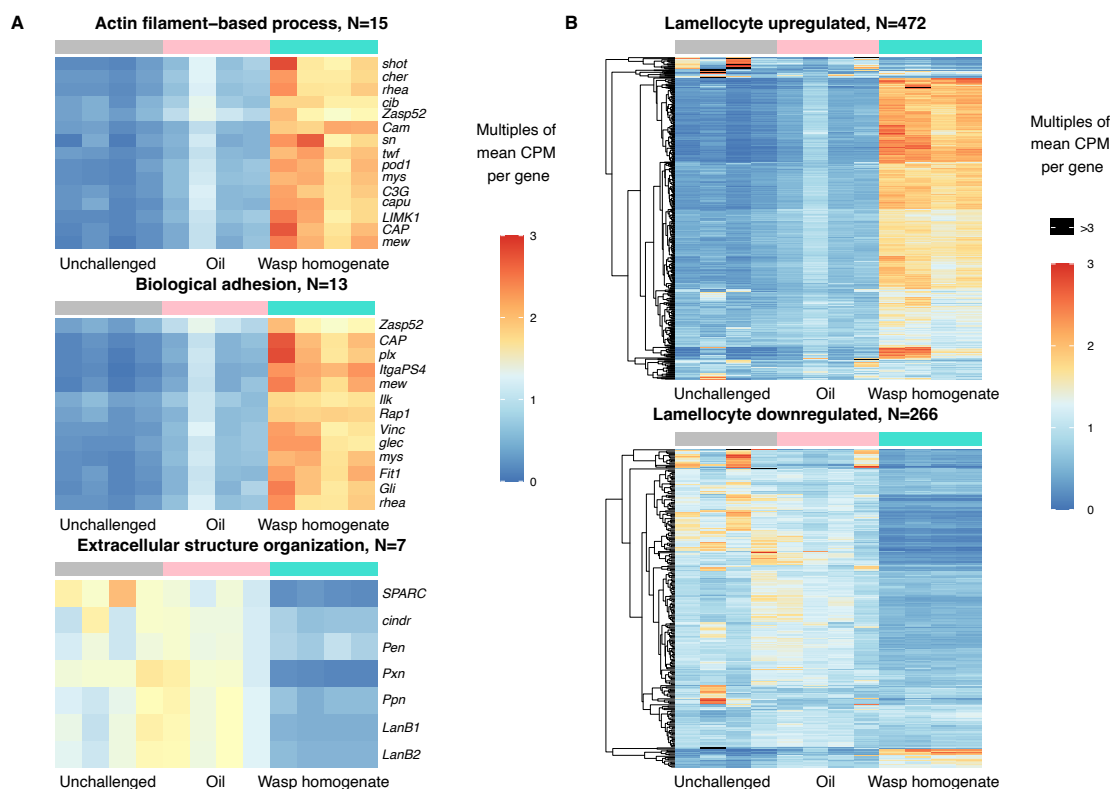

**Figure S3. Heatmap of lamellocyte marker genes.** Gene lists were attained from (Leitão et al. 2020). **(A)** Heatmap of genes part of gene ontology categories that are enriched in lamellocytes and plasmacytes. **(B)** Heatmap of genes differentially expressed in mature lamellocytes compared to their plasmacyte progenitors. The colour bar represents multiples of the mean counts per million (CPM) for each gene. As only few genes/samples had values >3, they are depicted as black.



789

790

791 **Table S1.** Quality and read mapping metrics for the 12 hemocyte and 12 fat  
792 body samples.

793

794 **Table S2.** Gene ontology (GO) terms, Kegg/Reactome pathways and Interpro  
795 protein that are significantly enriched in the fat body genes upregulated in  
796 wasp homogenate compared to unchallenged.

797

798 **Table S3.** Gene ontology (GO) terms, Kegg/Reactome pathways and Interpro  
799 protein domains that are significantly enriched in the differentially expressed  
800 genes in wasp homogenate compared to unchallenged in hemocytes.

801 Redundant GO categories were identified using REVIGO.

802

803 **Table S4.** List of primers used for qPCR.
